1 **Three complete genome sequences of Penguin megrivirus from ornithogenic soil, Adelie penguin**  
2 **and Weddell seal of Antarctica**

3

4 Ashutosh Aasdev<sup>a</sup>, Anamika Mishra<sup>a</sup>, Manoj Nair<sup>b</sup>, Satyam D Pawar<sup>a</sup>, Chandan K Dubey<sup>a</sup>, Sandeep  
5 Bhatia<sup>a</sup>, Prabir G Dastidar<sup>c</sup>, Vijendra Pal Singh<sup>a</sup>, Ashwin Ashok Raut<sup>a\*</sup>

6 <sup>a</sup>ICAR-National Institute of High Security Animal Diseases, Bhopal, Madhya Pradesh, India-462022

7 <sup>b</sup>Wildlife Institute of India, Dehradun, Uttarakhand, India-248001

8 <sup>c</sup>Ministry of Earth Sciences, Prithvi Bhavan, New Delhi - 110003

9

10 Running Head: Penguin megrivirus antarctica soil and wildlife

11

12 \*Corresponding Author: Ashwin Ashok Raut, ashwin.nihsad@gmail.com.

13

14

15

16

17

18

19

20

21

22 **Abstract**

23 We report the complete genome sequences of Penguin megriviruses from three different sources

24 from Antarctica namely feces of Adelie penguin, feces of Weddell seal and ornithogenic soil.

25 Phylogenetic analysis indicates the prevalence of very similar viruses in different sources of Antarctic

26 environment. These genome sequences aid to understand the evolution of megriviruses in Antarctic

27 ecology and reveal their place in global megrivirus phylogeny.

28

29

30

31

32

33

34

35

36

37

38

39

40

41

42

## 43 **Announcement**

44 The genus *Megrivirus* belongs to positive sense single stranded RNA virus family *Picornaviridae*.  
45 *Megrivirus* was classified as a genus in 2013 (1). Previously the genus had only one species, the  
46 Turkey hepatitis virus, but identification of new viruses has expanded the genus to five species and  
47 many unclassified viruses. All megriviruses identified infect aves, and have been identified from  
48 chicken to wild birds (2). Penguin megrivirus belongs to species *Megrivirus E* and was only recently  
49 reported in 2017 (3).

50 Samples for this study were collected in February 2018 as part of the 37<sup>th</sup> Indian Scientific Expedition  
51 to Antarctica, Ministry of Earth Sciences, Government of India. RNA extraction from the fecal  
52 samples was done on site at Bharati Station, Antarctica. Fresh fecal samples of Adelie penguin and  
53 Weddell seal were suspended in PBS and centrifuged at 12,000 RCF for 15 min. The supernatant was  
54 filtered (0.45µm) and RNA was extracted using QIAamp Viral RNA mini kit without adding carrier  
55 RNA. The RNA samples were dried in GenTegra RNA plates and transported to NIHSAD, Bhopal, India  
56 at room temperature. Ornithogenic soil sample transported in cold chain, was processed in the  
57 BSL3+ containment lab at NIHSAD. One gram of soil was suspended in 10 mL HBSS and incubated at  
58 room temperature for an hour followed by centrifugation at 6,000 RCF for 15 minutes at 4°C. The  
59 supernatant was filtered through 0.45µm filter and ultracentrifuged at 180,000 RCF for 4 hours at  
60 4°C. The pellet was resuspended in 280 µL HBSS and viral RNA extraction was done using QIAamp  
61 Viral RNA Mini Kit.

62 Highthroughput sequence data was generated at Genotypic Technology Private Limited, Bangalore,  
63 India by 2 X 150 bp paired end Illumina sequencing on MiSeq platform, using NEBNext<sup>®</sup> Ultra<sup>™</sup>  
64 Directional RNA Library Prep Kit. The raw reads were quality controlled using FastQC v0.11.3  
65 (<https://www.bioinformatics.babraham.ac.uk/projects/fastqc/>). Adapter and low quality bases were  
66 removed using Trimmomatic v0.39 (4). BLASTn of the processed reads was performed against a  
67 custom viral genome database using local blast v2.8.1+. Reads for individual virus reference

68 sequences were extracted. The reference sequences with high number of reads originating from  
69 them were used for mapping the reads using BWA-MEM v0.7.17-r1194-dirty (5). Consensus  
70 sequence were evaluated using BCF tools v1.9 (6). PCR confirmation of virus genome was done using  
71 primers, PM-F120 5'-TGGAGCTGCCATCACGTGTT-3' and PM-R120 5'-TCCTGACACTGGTCACGTCT-3'.  
72 Few of the terminal nucleotides could not be read for the sequences as indicated in Table 1. NCBI  
73 ORF finder was used to predict the ORF's. The polyprotein ORF is between nucleotide positions 718  
74 and 9030 and codes for a 2770 amino acid polypeptide. The complete polypeptide sequences of 16  
75 megriviruses was downloaded from NCBI and protein alignment performed using MUSCLE in MEGA7  
76 (7). Neighbour-joining phylogenetic tree was constructed using Poisson model and 1000 bootstrap  
77 replicates. The viruses form a monophylectic group. The pairwise amino acid identity amongst the  
78 viruses under study is from 99.75% to 99.9%. The 5' UTR secondary structure was predicted using  
79 mfold (8). The structure contains elements similar to domain II and III of megrivirus IRES (9, 10). Also,  
80 the conserved 20 nucleotides which make the '8' like structure in domain III are present (9, 10). The  
81 3' UTR contains 2 unit A repeats while the AUG rich region following the repeats is absent (10).

82 In summary we report the complete genome sequences and phylogenetic relation of closely related  
83 Penguin megiviruses from three different sources of Antarctica samples. The presence of the virus in  
84 fecal samples points to its probable enteric localization. Also, Penguin megrivirus, which is known to  
85 infect birds, was identified in Weddell seal feces and there is futher need to investigate its ecological  
86 relations and infectivity.

#### 87 **Data Availability**

88 The genome nucleotide sequences have been submitted to GenBank under accession numbers  
89 MN453780, MN453781 and MN453782.

90

91

92 **Acknowledgements**

93 Indian Scientific Expeditions to Antarctica (ISEA) by National Center for Polar and Ocean Research,  
94 Goa supported by Earth System Science Organization, Ministry of Earth Sciences (ESSO-MoES),  
95 Government of India (GoI). Indian Council of Agricultural Research and Director, National Institute of  
96 High Security Animal Diseases, Bhopal for deputation of Scientist under ISEA and providing necessary  
97 facilities to conduct this work.

98

99

100

101

102

103

104

105

106

107

108

109

110

111

112

113 **References**

- 114 **1.** Adams M J, King A M Q, Carstens E B. 2013. Ratification vote on taxonomic proposals to the  
115 International Committee on Taxonomy of Viruses. *Archives of Virology* **158**:2023-2030.  
116
- 117 **2.** Boros A, Pankovics P, Mátics R, Adonyi A, Bolba N, Phan T G, Delwart E, Reuter G. 2017.  
118 Genome characterization of a novel megrivirus-related avian picornavirus from a  
119 carnivorous wild bird, western marsh harrier (*Circus aeruginosus*). *Archives of Virology*  
120 **162**:2781-2789.  
121
- 122 **3.** Zell R. 2017. Picornaviridae — the ever growing virus family. *Archives of Virology* **163**:299-  
123 317.  
124
- 125 **4.** Bolger A M, Lohse M, Usadel B. 2014. Genome analysis Trimmomatic : a flexible trimmer for  
126 Illumina sequence data. *Bioinformatics* **30**:2114–2120.  
127
- 128 **5.** Li, H. 2013. Aligning sequence reads , clone sequences and assembly contigs with BWA-  
129 MEM. *arXiv* 1303.  
130
- 131 **6.** Li H. 2011. A statistical framework for SNP calling , mutation discovery , association mapping  
132 and population genetical parameter estimation from sequencing data. *Bioinformatics*  
133 **27**:2987–2993.  
134
- 135 **7.** Kumar S, Stecher G, Tamura K. 2016. MEGA7: Molecular Evolutionary Genetics Analysis  
136 Version 7.0 for Bigger Datasets. *Mol Biol Evol* **33**:1870–4.  
137

- 138        **8.** Zuker M. 2003. Mfold web server for nucleic acid folding and hybridization prediction.  
139                *Nucleic Acids Research* **31**:3406–3415.  
140
- 141        **9.** Wang F, Liang T, Liu N, Ning K, Yu K, Zhang D. 2017. Genetic characterization of two novel  
142                megriviruses in geese. *Journal of General Virology* **98**:607-611.  
143
- 144        **10.** Boros A, Pankovics P, Knowles N J, Nemes C, Delwart E, Reuter G. 2014. Comparative  
145                Complete Genome Analysis of Chicken and Turkey Megriviruses (Family *Picornaviridae*):  
146                Long 3' Untranslated Regions with a Potential Second Open Reading Frame and Evidence for  
147                Possible Recombination. *J Virol* **88**:6434-6443.  
148  
149  
150  
151  
152  
153  
154  
155  
156  
157  
158  
159  
160  
161  
162  
163

**Table 1: Sampling location and sequencing metrics of the Penguin megriviruses from Antarctica**

| <b>Sample</b>         | <b>Accession Numbers</b> | <b>Location</b>                            | <b>Total number of reads</b> | <b>Number of mapped reads</b> | <b>Average coverage</b> | <b>Percentage genome obtained</b> | <b>Number of missing terminal nucleotides</b> | <b>G+C content (%)</b> |
|-----------------------|--------------------------|--------------------------------------------|------------------------------|-------------------------------|-------------------------|-----------------------------------|-----------------------------------------------|------------------------|
| Ornithogenic soil     | MN453780                 | Svenner Islands, Prydz Bay (-69.03, 76.83) | 176,926,262                  | 4,273,385                     | 62,167                  | 99.93                             | 4                                             | 42.87                  |
| Adelie penguin feaces | MN453781                 | Svenner Islands, Prydz Bay (-69.03, 76.83) | 144,867,534                  | 11,520                        | 169                     | 99.88                             | 13                                            | 43.03                  |
| Weddell seal feaces   | MN453782                 | Larsemann Hills, Prydz Bay (-69.58, 78.55) | 133,147,552                  | 3,085                         | 44                      | 99.92                             | 8                                             | 43.04                  |
